# Supplementary material for: High-efficiency photo-oxidation of thioethers over C60@PCN-222 under air
Source: Royal Society of Chemistry journal article supplement (doi:10.1039/c9ta07965c), 2019-01-01
Supplement: c9ta07965c1.pdf [file c9ta07965c1.pdf]

## Electronic supplementary information

### High efficiency photo-oxidation of thioethers over $C_{60}@PCN-222$ under air

Deng-Yue Zheng, En-Xuan Chen, Chun-Rong Ye, and Xiao-Chun Huang\*

Department of Chemistry and Key Laboratory for Preparation and Application of Ordered Structural Materials of Guangdong Province Shantou University, Guangdong, 515063, P. R. China

Guangdong Provincial Laboratory of Chemistry and Fine Chemical Engineering, Guangdong, 515063 P.R. China

\*E-mail: xchuang@stu.edu.cn

- **Fig. S1.** A linear relationship between the  $C_{60}$  concentration and its UV absorbance.
- **Fig. S2.** UV analysis of  $C_{60}$  content in a series of  $C_{60}@PCN-222$  composites.
- **Fig. S3** DFT pore size distribution for  $C_{60}@PCN-222$  photocatalysts.
- **Fig. S4** Solid-state UV-*vis* spectra of  $C_{60}@PCN-222$  samples.
- **Fig. S5** Room-temperature PL excitation and emission spectra of  $C_{60}@PCN-222$  samples.
- **Fig. S6** Time course of the products distribution for the photocatalytic oxidation of thioanisole.
- **Fig. S7-S8** Recycling experiments of the 3%- $C_{60}@PCN-222$  photocatalyst.
- **Scheme S1** Proposed mechanism for the selective oxidation of sulfides into sulfoxides.
- **Table S1** Comparison of the photocatalytic oxidation activities of thioanisole to phenyl methyl sulfoxide.

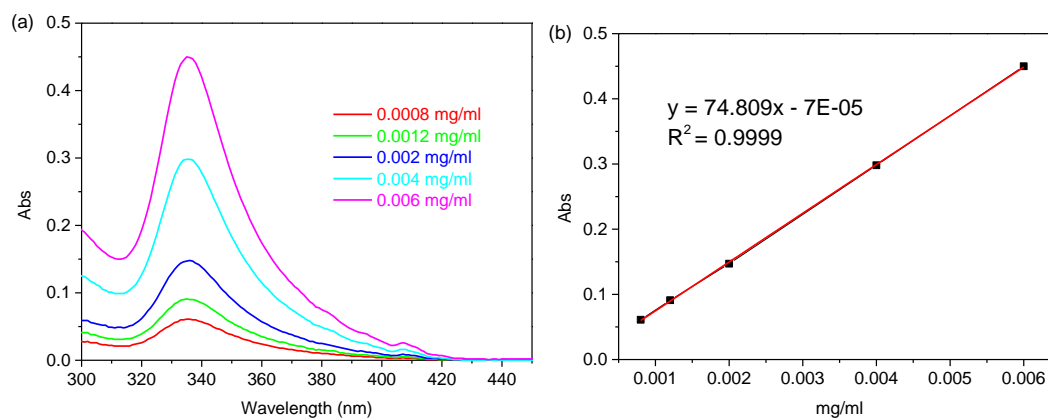

**Fig. S1** A linear relationship between the C<sub>60</sub> concentration and its UV absorbance.

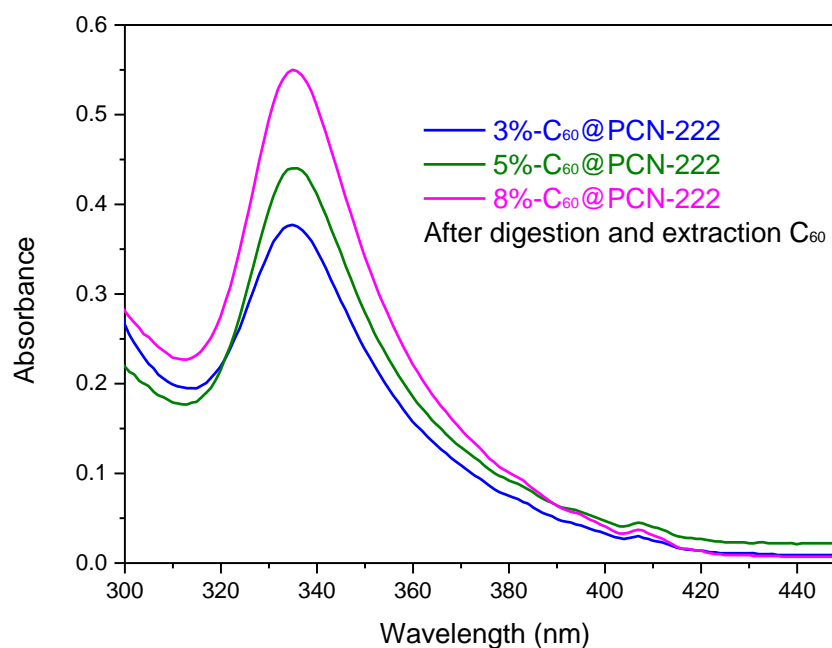

**Fig. S2** UV analysis of C<sub>60</sub> content in a series of C<sub>60</sub>@PCN-222 composites.

**C<sub>60</sub> content calculation:** C<sub>60</sub>@PCN-222 samples were digested by 1 mol/L KOH solution, then 100 mL toluene were used to extract C<sub>60</sub> for several times, and then the extraction solution was analyzed by UV spectrum based on working curve in Fig. S1.

| Sample name                 | Sample usage (mg) | Toluene (mL) | UV-vis absorbance | <i>c.</i> (mg/mL) | C <sub>60</sub> /C <sub>60</sub> @PCN-222 |
|-----------------------------|-------------------|--------------|-------------------|-------------------|-------------------------------------------|
| 3%-C <sub>60</sub> @PCN-222 | 15                | 100          | 0.37              | 0.0049            | 0.032                                     |
| 5%-C <sub>60</sub> @PCN-222 | 12                | 100          | 0.43              | 0.0059            | 0.049                                     |
| 8%-C <sub>60</sub> @PCN-222 | 9                 | 100          | 0.55              | 0.0073            | 0.081                                     |

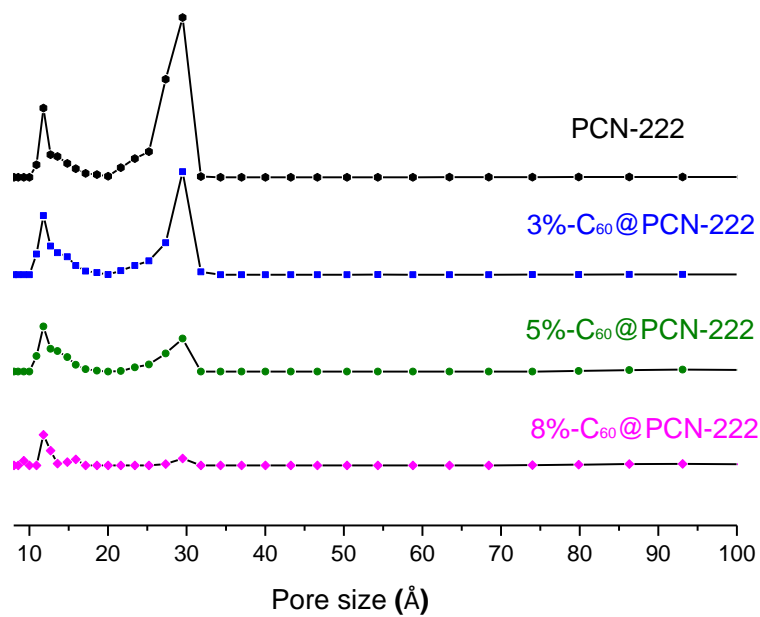

**Fig. S3** DFT pore size distribution for as-synthesized PCN-222 and C<sub>60</sub>@PCN-222 composites with different C<sub>60</sub> contents based on N<sub>2</sub> adsorption isotherms at 77 K.

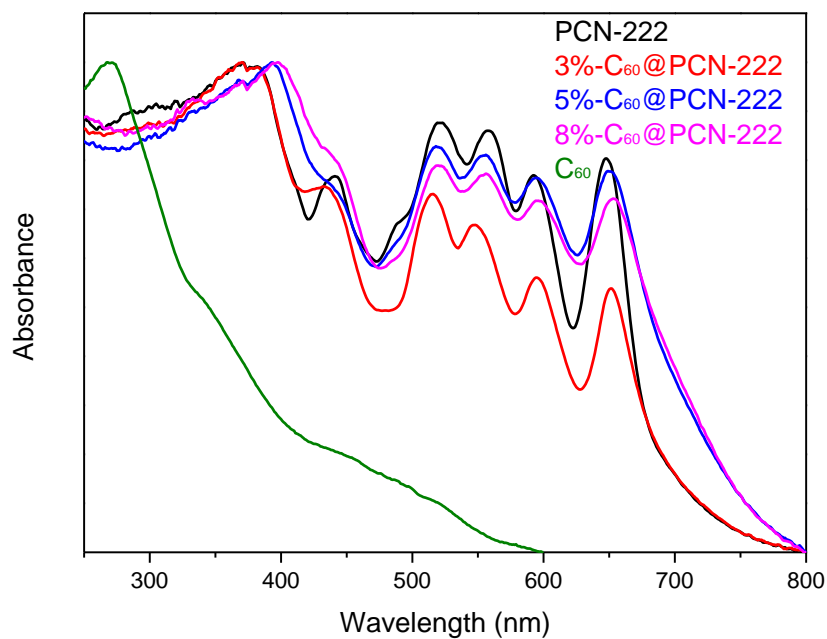

**Fig. S4** Solid-state UV-vis spectra of PCN-222 and 3%/5%/8%-C<sub>60</sub>@PCN-222 at room temperature.

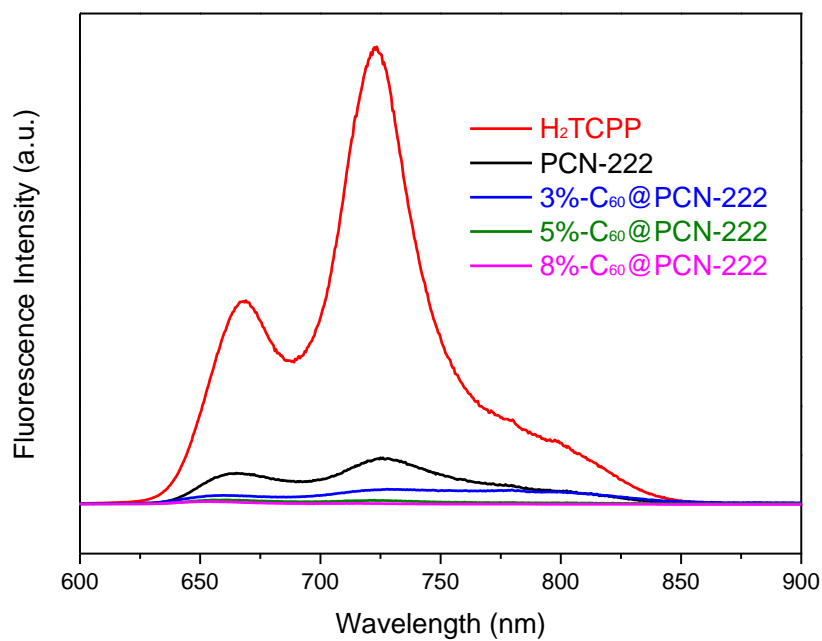

**Fig. S5** Room-temperature PL spectra of H<sub>2</sub>TCPP, PCN-222, 3%/5%/8%-C<sub>60</sub>@PCN-222 composites ( $\lambda_{\text{ex}} = 380 \text{ nm}$ ).

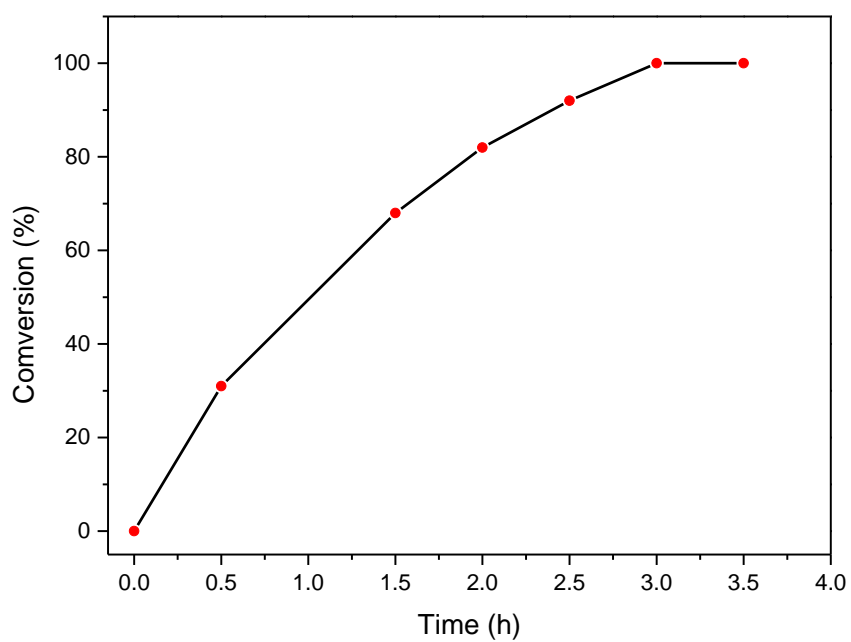

**Fig. S6** Time course of the products distribution for the photocatalytic oxidation of thioanisole.

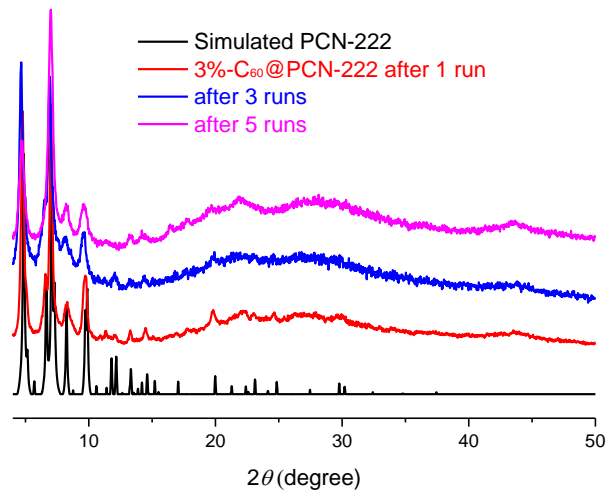

**Fig. S7** PXRD profiles of 3%-C<sub>60</sub>@PCN-222 after catalytic reaction

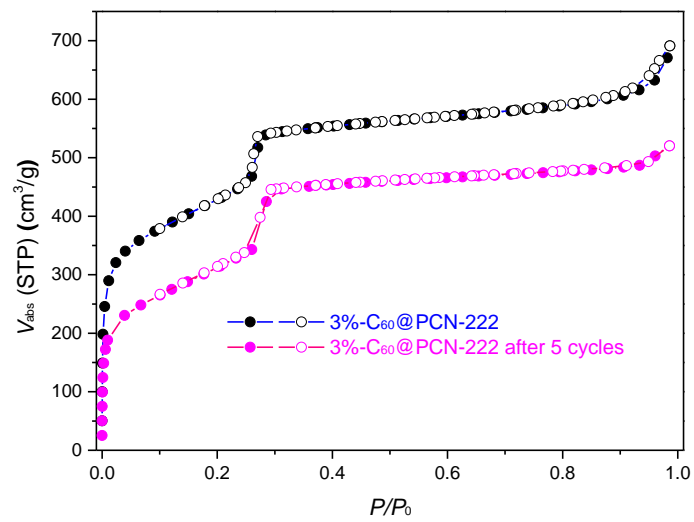

**Fig. S8** N<sub>2</sub> sorption isotherms for 3%-C<sub>60</sub>@PCN-222 before reaction and after 5 catalytic cycles at 77 K

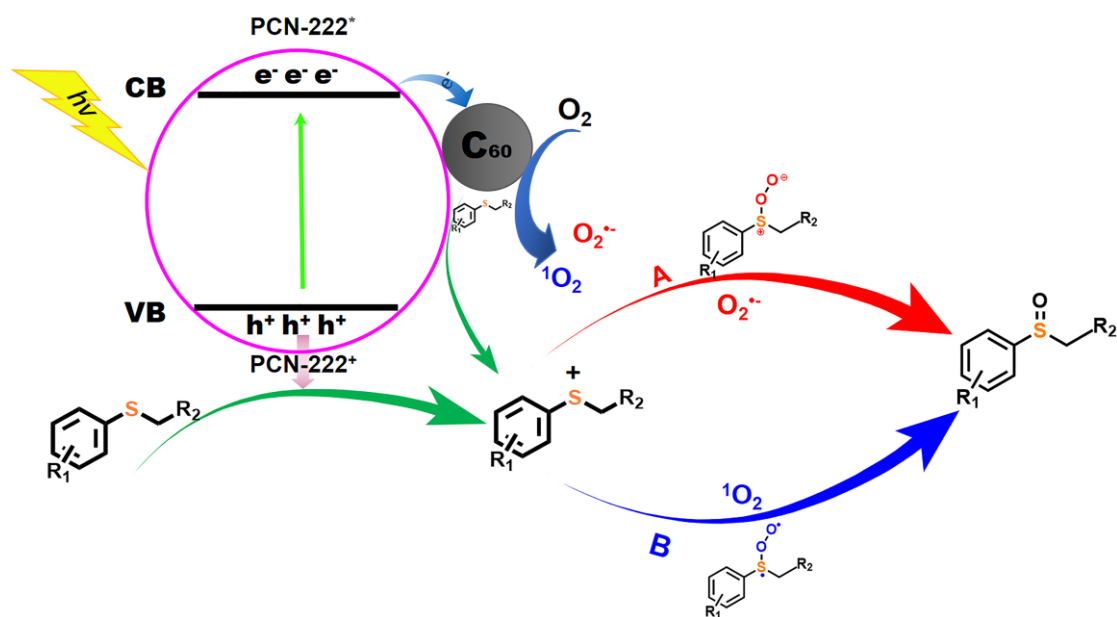

**Scheme S1.** The proposed mechanism for the selective oxidation of sulfides into sulfoxides with air in the merger of visible light photocatalysis of  $C_{60}@PCN-222$ .

**Table S1.** Comparison of the photocatalytic oxidation activities of thioanisole to phenyl methyl sulfoxide.

| Catalytic                                                                       | Oxid.                         | T. (h) | Abs. (nm)                    | Photo intensity       | Con. (%) | Sel. (%) | TOF (h <sup>-1</sup> ) | Ref.                                                |
|---------------------------------------------------------------------------------|-------------------------------|--------|------------------------------|-----------------------|----------|----------|------------------------|-----------------------------------------------------|
| 3%-C <sub>60</sub> @PCN-222                                                     | air                           | 3      | $\lambda > 400$              | 50 mW/cm <sup>2</sup> | 100      | 100      | 80 <sup>b</sup>        | This work                                           |
| 5%-C <sub>60</sub> @PCN-222                                                     | air                           | 2      | $\lambda > 400$              | 50 mW/cm <sup>2</sup> | 100      | 100      | 71.4 <sup>b</sup>      | This work                                           |
| 8%-C <sub>60</sub> @PCN-222                                                     | air                           | 2      | $\lambda > 400$              | 50 mW/cm <sup>2</sup> | 100      | 100      | 45.5 <sup>b</sup>      | This work                                           |
| MOF-6                                                                           | air                           | 22     | --                           | 26 W fluorescent lamp | 73       | 100      | 16.6                   | <i>J. Am. Chem. Soc.</i> 2011, 133, 13445           |
| Ru <sup>II</sup> <sub>chro</sub> -Cu <sup>II</sup> <sub>cat</sub> <sup>a</sup>  | air                           | 20     | --                           | blue LEDs             |          | 90       | 2                      | <i>ChemSusChem</i> 2017, 10, 3358                   |
| pTCT                                                                            | air                           | 12     | --                           | 26 W white CFL        | > 99     | 97       | 0.007                  | <i>J. Mater. Chem. A</i> 2018, 6, 15154             |
| 1 (MOF)                                                                         | H <sub>2</sub> O <sub>2</sub> | 4      | $\lambda > 420$              | 300 W Xe lamp         | 99       | 95       | 16.7                   | <i>ACS Appl. Mater. Interfaces</i> 2019, 11, 3016.  |
| RuII(TMP)(CO) <sub>2</sub> <sup>a</sup>                                         | PhI(OAc) <sub>2</sub>         | 10     | $\lambda_{\text{max}} = 420$ | --                    | 100      | 99       | 31.25                  | <i>Applied Catalysis A: General</i> 2014, 478, 275. |
| 4%C <sub>60</sub> /g-C <sub>3</sub> N <sub>4</sub>                              | O <sub>2</sub>                | 6      | $\lambda > 400$              | 1 W/cm <sup>2</sup>   | 100      | 100      | 20                     | <i>ChemSusChem</i> 2018, 11, 2444                   |
| TBA <sub>4</sub> H[ $\gamma$ -PV <sub>2</sub> W <sub>10</sub> O <sub>40</sub> ] | O <sub>2</sub>                | 24     | $\lambda > 400$              | xenon lamp            | 100      | 92       | 0.0004                 | <i>Chem. Commun.</i> 2018, 54, 7127                 |
| DBFL <sup>a</sup>                                                               | O <sub>2</sub>                | 8.3    | --                           | 110 W/m <sup>2</sup>  | 100      | 100      | 0.005                  | <i>ACS Sustainable Chem. Eng.</i> 2018, 6, 15254    |
| SnPor@PAF                                                                       | O <sub>2</sub>                | 0.5    | --                           | 90 mW/cm <sup>2</sup> | 31       | 99       | 19872                  | <i>Adv. Synth. Catal.</i> 2018, 360, 4402           |

|                                                          |                |     |         |                                 |        |        |       |                                                  |
|----------------------------------------------------------|----------------|-----|---------|---------------------------------|--------|--------|-------|--------------------------------------------------|
| Au <sub>38</sub> S <sub>2</sub> (SAdm) <sub>2</sub><br>0 | O <sub>2</sub> | 12  | 532     | ~34<br>mW/cm <sup>2</sup>       | 58     | 100    | 20.83 | <i>ACS Catal.</i> 2017,<br>7, 3368               |
| ARS-TiO <sub>2</sub>                                     | O <sub>2</sub> | 10  | λ > 450 | 300 W<br>Xe<br>lamp             | 81     | 91     | 75    | <i>Angew. Chem.</i><br>2016, 128, 4775           |
| Degussa P <sub>25</sub><br>TiO <sub>2</sub>              | O <sub>2</sub> | 22  | λ > 400 | 300 W<br>Xe<br>lamp             | 81     | 93     | 0.05  | <i>Chem. Sci.</i> 2015,<br>6, 5000               |
| TiO <sub>2</sub>                                         | O <sub>2</sub> | 4   | λ > 400 | 300 W<br>Xe<br>lamp             | 83     | 92     | 0.15  | <i>Chem. Sci.</i> 2015,<br>6, 1075               |
| 0.5 wt.%<br>Pt/BiVO <sub>4</sub>                         | O <sub>2</sub> | 5.5 | λ > 420 | 300 W<br>Xe<br>lamp             | 96     | 98     | 36    | <i>Journal of<br/>Catalysis</i> 2015,<br>332, 95 |
| 1 (MOF)                                                  | O <sub>2</sub> | 12  | --      | 350 W<br>Xe<br>lamp             | > 99.9 | > 99.9 | 0.84  | <i>Inorg. Chem.</i><br>2011, 50, 5318            |
| cdcn(30)                                                 | O <sub>2</sub> | 6   | --      | white<br>LEDs                   | 61.8   | 99     | 2.1   | <i>Catal. Sci.<br/>Technol.</i> 2017, 7,<br>587  |
| mpg-C <sub>3</sub> N <sub>4</sub>                        | O <sub>2</sub> | 4   | λ > 420 | a<br>mercury<br>lamp<br>(150 W) | 97     | 98     | 0.62  | <i>Green Chem.</i><br>2012, 14, 1904             |

<sup>a</sup> homogeneous photocatalyst

<sup>b</sup> Turnover frequency (TOF) = [moles of **1b**] / [(moles of C<sub>60</sub>) × (reaction time)]
